# Supplementary material for: Gut microbiota drives the attenuation of dextran sulphate sodium-induced colitis by Huangqin decoction
Source: PubMed Central journal article supplement (PMC5564731; doi:10.18632/oncotarget.16458), 2017-03-22
Supplement: oncotarget-08-48863-s001.pdf [file oncotarget-08-48863-s001.pdf]

# Gut microbiota drives the attenuation of dextran sulphate sodium-induced colitis by Huangqin decoction

## Supplementary Materials

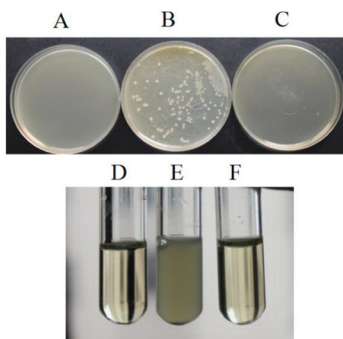

**Supplementary Figure 1: Effects of antibiotic on gut bacterial growth in mice.** (A) Sterilized water (A and D), faeces dilution from normal mice (B and E) and faeces dilution from antibiotic treated mice (C and F) growth in solid medium and liquid medium.

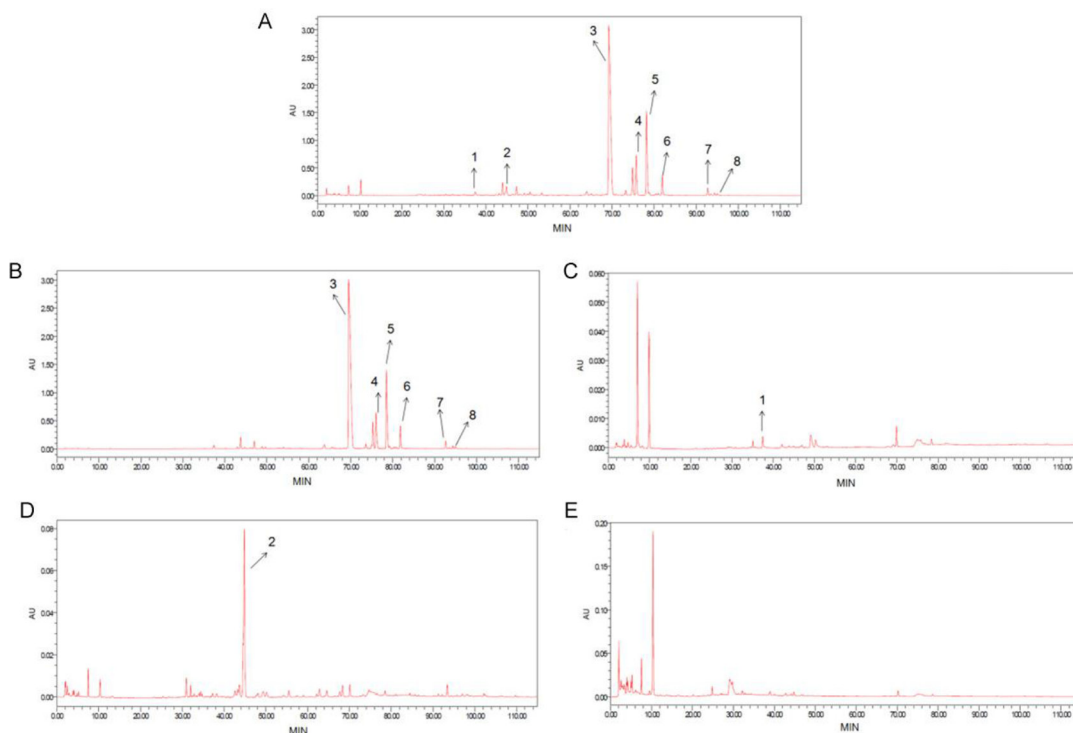

**Supplementary Figure 2: HPLC chromatogram of single herbal and HQD extracts.** (A) HQD, (B) *Scutellaria baicalensis* Georgi, (C) *Paeonia lactiflora* Pall, (D) *Glycyrrhiza uralensis* Fisch, (E) *Ziziphus jujuba* Mill.

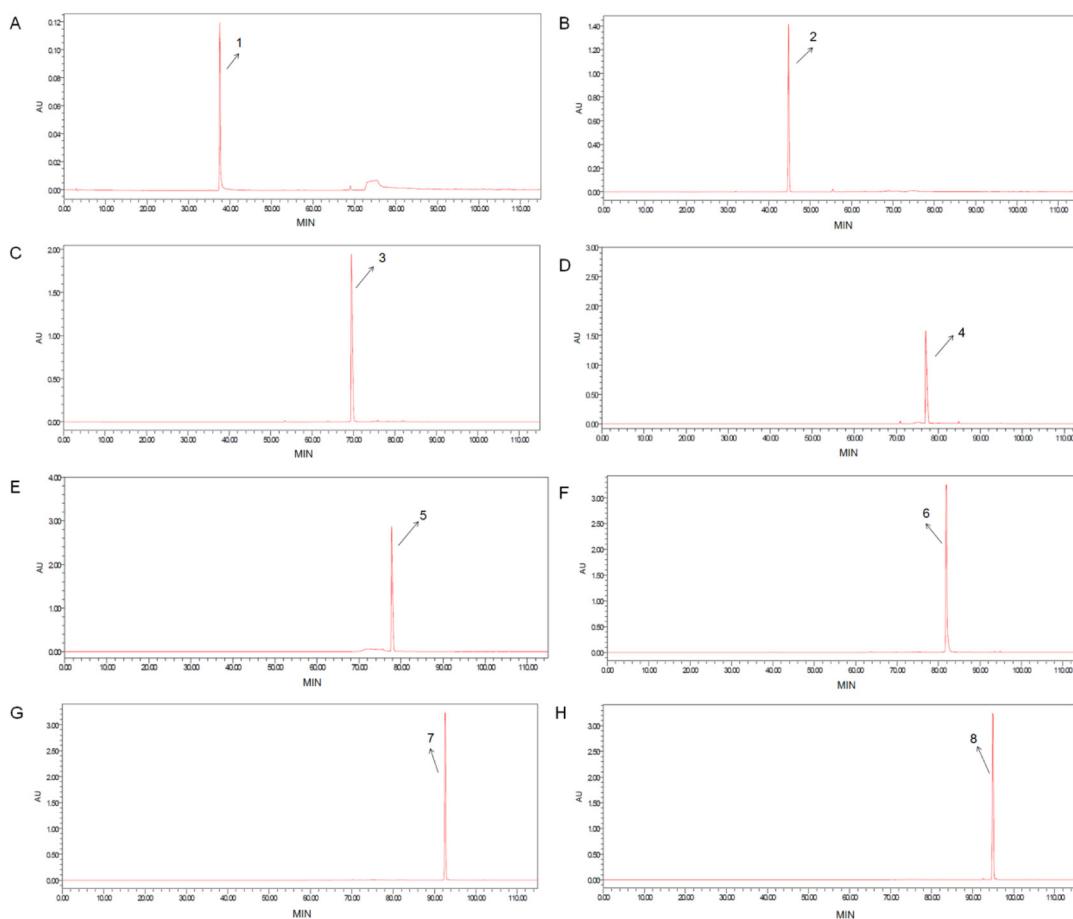

**Supplementary Figure 3: HPLC chromatogram of standard.** (A) Paeoniflorin, (B) Liquiritin, (C) Baicalin, (D) Oroxylin A-7-glucuronide, (E) Wogonoside, (F) Baicalein, (G) Wogonin, (H) Oroxylin A.

**Supplementary Table 1: The composition of HQD**

| Species                               | Chinese name | Plant part        | Grams, g |
|---------------------------------------|--------------|-------------------|----------|
| <i>Scutellaria baicalensis</i> Georgi | Huang qin    | Root              | 9        |
| <i>Paeonia lactiflora</i> Pall        | Shao yao     | Root              | 6        |
| <i>Glycyrrhiza uralensis</i> Fisch    | Gan cao      | Root and rhizomes | 6        |
| <i>Ziziphus jujuba</i> Mill           | Da zao       | Fruit             | 49       |
| Total amount                          |              |                   | 70       |

**Supplementary Table 2: Compounds in HQD**

| No. | t <sub>R</sub> (min) | Identification           | Chemical structure                                                                  | Molecular formula                               | Source                                |
|-----|----------------------|--------------------------|-------------------------------------------------------------------------------------|-------------------------------------------------|---------------------------------------|
| 1   | 37.561               | Paeoniflorin             | 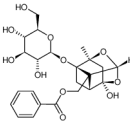   | C <sub>23</sub> H <sub>28</sub> O <sub>11</sub> | <i>Paeonia lactiflora</i> Pall        |
| 2   | 44.797               | Liquiritin               |    | C <sub>21</sub> H <sub>22</sub> O <sub>9</sub>  | <i>Glycyrrhiza uralensis</i> Fisch    |
| 3   | 54.002               | Baicalin                 |    | C <sub>21</sub> H <sub>18</sub> O <sub>11</sub> | <i>Scutellaria baicalensis</i> Georgi |
| 4   | 75.484               | Oroxylin A-7-glucuronide |    | C <sub>22</sub> H <sub>20</sub> O <sub>11</sub> | <i>Scutellaria baicalensis</i> Georgi |
| 5   | 78.004               | Wogonoside               |    | C <sub>22</sub> H <sub>20</sub> O <sub>11</sub> | <i>Scutellaria baicalensis</i> Georgi |
| 6   | 81.748               | Baicalein                |   | C <sub>15</sub> H <sub>10</sub> O <sub>5</sub>  | <i>Scutellaria baicalensis</i> Georgi |
| 7   | 92.537               | Wogonin                  |  | C <sub>16</sub> H <sub>12</sub> O <sub>5</sub>  | <i>Scutellaria baicalensis</i> Georgi |
| 8   | 94.824               | Oroxylin A               |  | C <sub>16</sub> H <sub>12</sub> O <sub>5</sub>  | <i>Scutellaria baicalensis</i> Georgi |

**Supplementary Table 3: Validation of linearity, sensitivity, precision, stability and repeatability**

| Analyte                      | Linearity     |                                           |                        | Sensitivity (ng/mL) |         | Precision (RSD, %) |                   | Stability (RSD, %, n = 6) | Repeatability (RSD, %, n = 3) |
|------------------------------|---------------|-------------------------------------------|------------------------|---------------------|---------|--------------------|-------------------|---------------------------|-------------------------------|
|                              | Range (µg/mL) | Equation                                  | R <sup>2</sup>         | LOD                 | LOQ     | Intra-day (n = 6)  | Inter-day (n = 3) | HQD                       | HQD                           |
| Paeoniflorin (1)             | 3.815–38.15   | $y = 8 \times 10^7 \times + 13445$        | R <sup>2</sup> = 0.990 | 863.58              | 4263.45 | 1.03               | 1.29              | 1.79                      | 1.29                          |
| Liquiritin (2)               | 1.155–11.55   | $y = 1 \times 10^9 \times + 38914$        | R <sup>2</sup> = 0.993 | 67.46               | 325.50  | 1.12               | 2.02              | 2.98                      | 1.02                          |
| Baicalin (3)                 | 1.21–12.1     | $y = 1 \times 10 \times + 3 \times 106$   | R <sup>2</sup> = 0.997 | 360                 | 3025    | 2.15               | 2.15              | 2.02                      | 2.15                          |
| Oroxilin A-7-glucuronide (4) | 2.125–34.0    | $y = 3 \times 10^9 \times + 3 \times 106$ | R <sup>2</sup> = 0.991 | 474.3               | 1517.85 | 2.79               | 2.09              | 2.14                      | 2.32                          |
| Wogonoside (5)               | 4.25–34.0     | $y = 3 \times 10^9 \times -7 \times 106$  | R <sup>2</sup> = 0.991 | 2547.72             | 2421.84 | 2.23               | 1.29              | 1.23                      | 1.23                          |
| Baicalein (6)                | 0.745–7.45    | $y = 5 \times 10^9 \times -20357$         | R <sup>2</sup> = 0.999 | 21.88               | 72.53   | 1.28               | 1.02              | 1.22                      | 1.22                          |
| Wogonin(7)                   | 0.113–2.25    | $y = 1 \times 10^{10} \times +17890$      | R <sup>2</sup> = 0.999 | 5.82                | 31.66   | 2.79               | 1.79              | 1.79                      | 0.79                          |
